# Supplementary material for: Direct non-productive HIV-1 infection in a T-cell line is driven by cellular activation state and NFκB
Source: PubMed Central journal article supplement (PMC4015675; doi:10.1186/1742-4690-11-17), 2014-02-07

**A**

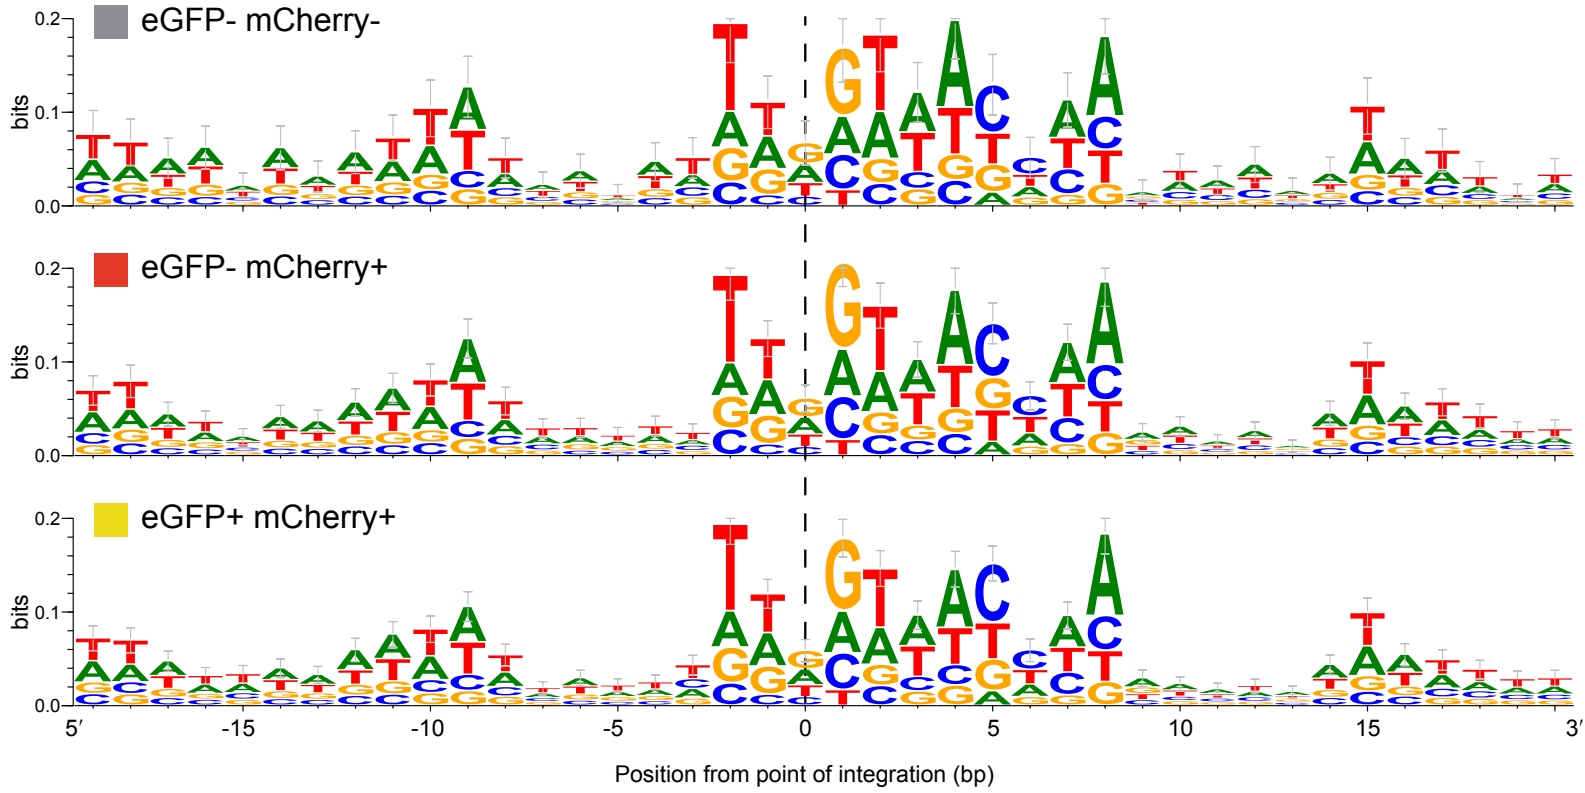

**B**

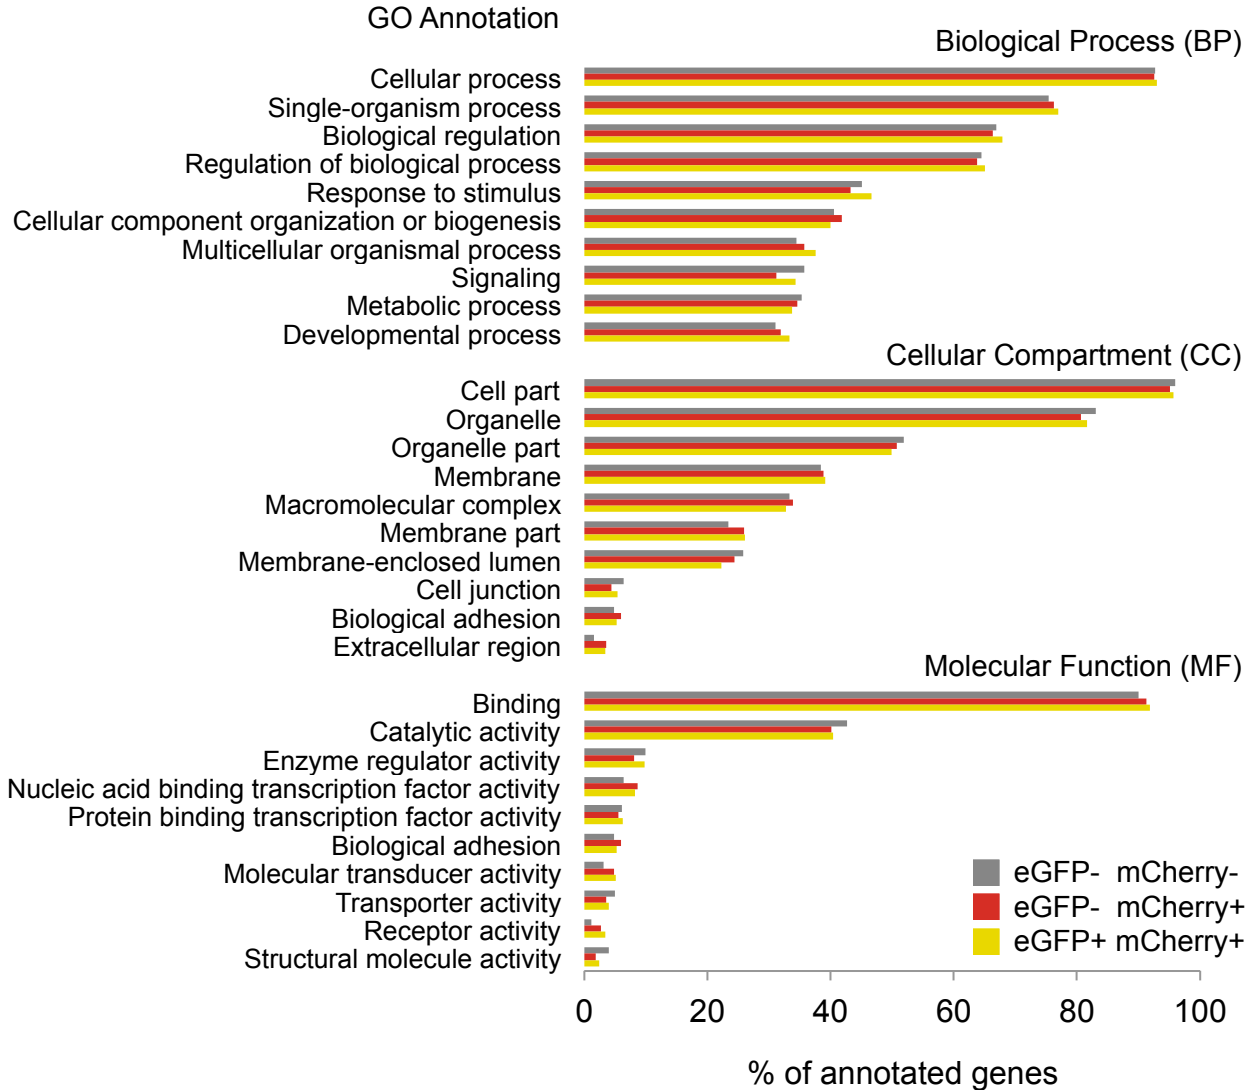

Supplement: 1742-4690-11-17-S2.pdf [file 1742-4690-11-17-S2.pdf]
